# Supplementary material for: Consumers’ Trust in Different Sources of Information Related to Food Hazards and Their Judgment of Government Performance—A Cross-Sectional Study in Brazil
Source: MDPI journal article supplement (doi:10.3390/foods12173285), 2023-09-01
Supplement: s1 [file s1]

# **Consumers' Trust in Different Sources of Information Related to Food Hazards and Their Judgment of Government Performance—A Cross-Sectional Study in Brazil**

Peter Rembischevski 1 and Eloisa Dutra Caldas 2,\*

1 Brazilian Health Regulatory Agency (Anvisa), Brasilia 71205-050, DF, Brazil;  
peter.rembischevski@anvisa.gov.br

2 Laboratory of Toxicology, Department of Pharmacy, Faculty of Health Sciences,  
University of Brasilia, Darcy Ribeiro Campus, Brasilia 70910-900, DF, Brazil

\* Correspondence: eloisa@unb.br

## **SUPPLEMENTARY MATERIAL**

### **Questionnaire**

Risk perception, consumer behavior and trust in information sources and  
performance of government on food safety issues

**Participant number:** \_\_\_\_\_

**Location:** \_\_\_\_\_

**Gender:** Male ( ) Female ( ) Other ( )

**Age:** \_\_\_\_\_

**1. Monthly family income:**

- ( ) Up to R\$998 (1 minimum wage)
- ( ) Between R\$998 and R\$2.000
- ( ) Between R\$2.001 and R\$ 5.000
- ( ) Between R\$5.001 and R\$ 10.000
- ( ) Over R\$10.000

**2. Education:**

- ( ) Incomplete primary school
- ( ) Complete primary school
- ( ) Incomplete high school
- ( ) Complete high school
- ( ) Incomplete college
- ( ) Complete college
- ( ) Postgraduate

**3. How much do you consume of foods below? 1: not much; 2: medium or 3: a lot.**

Canned and industrialized -

Fruits and vegetables -

Meat and eggs -

Cereals and grains - (eg., rice, bean)

Carbohydrates (eg., pasta, bread) -

**4. What is the main characteristic do you seek in the food? You can tick more than one.**

- ( ) Tasty
- ( ) Nutritious
- ( ) Safe
- ( ) Healthy
- ( ) Low price

**5. Do you think food can be deleterious to health?**

- ( ) Often
- ( ) Occasionally
- ( ) Rarely
- ( ) Never

**6. What is your worry level about the presence of chemicals or contaminants in food?**

- ( ) High
- ( ) Medium
- ( ) Low
- ( ) None

**7. When was the last time you've read, saw or heard that foods can be harmful to health due to the presence of chemicals?**

- ( ) In the last 7 days
- ( ) About 1 month ago
- ( ) In the last year
- ( ) More than 1 year ago
- ( ) Never/I don't remember

**8. Do you read food labels?**

- ( ) Always
- ( ) Almost always
- ( ) Sometimes
- ( ) I'm not used to
- ( ) The expiry date only

**9. If you are not used to read food labels, point out the main reason:**

- ( ) Too small letters
- ( ) Technical terms, I don't understand
- ( ) I have no interest
- ( ) I don't have the time or patience
- ( ) Others: \_\_\_\_\_

**10. Have you ever stopped eating something you like for fear of not being good for your health?**

- ( ) More than once
- ( ) Once
- ( ) Never
- ( ) I don't remember

**11. Do you use to buy organic food?**

- ( ) Exclusively
- ( ) Almost always
- ( ) Sometimes
- ( ) Never, I don't think it's relevant

☐ I would like it, but it's expensive

☐ I do not know what this means

**12. Do you believe it is possible to produce food without pesticides in enough quantity for the whole population?**

☐ Yes, all foods

☐ Yes, some foods

☐ Maybe, I am not sure

☐ No food

☐ I have no opinion about

**13. Do you think it's relevant for some foods to have the presence of pesticides indicated in the label?**

☐ Yes, at least inform if it contains or not

☐ Yes, and inform all pesticides

☐ I see no need

☐ I have no opinion about

**14. What do you think pesticides present in food can cause to health? You can tick more than option.**

☐ Cancer

☐ Hormonal effects

☐ Reproductive effects

☐ Effects on the brain/nervous system

☐ Headache, malaise, nausea

☐ Other effects

☐ No negative health effects

☐ I don't know/I prefer not to give an opinion

**15. Have you ever had any symptoms or illnesses that you believed was caused by pesticides or chemical contaminants in food?**

☐ Never

☐ More than once

☐ Once

☐ Maybe, I am not sure

**16. Do you make any procedure at home to remove or reduce pesticide levels in food, such as washing and peeling?**

☐ Always

☐ Often

☐ Rarely

☐ Never

**17. Do you know the meaning of the T symbol?**

☐ Yes

☐ Maybe

☐ No, I've never notice it.

**18) Do you refuse buying food with this symbol?**

☐ Always/almost always

☐ Sometimes

☐ Not relevant.

**19. How do you judge the performance of government institutions responsible for guarantee food safety? (Anvisa, Ministry of Agriculture, Ministry of Health)**

☐ Very good

☐ Good

☐ Acceptable

☐ Low

☐ Very low

☐ Don't have an opinion

**20. If you considered the performance low or very low, what could be done to improve it?**

☐ Increase inspection in industries

☐ Increase inspection in commerce

☐ Apply more fines to offenders

☐ Improve risk communication

☐ Prioritize consumer health

☐ Require more information on the label

**21. When was the last time you've read, saw or heard that genetically modified food may be harmful to health?**

☐ In the last 7 days

☐ About 1 month ago

☐ Between 1 and 6 months

☐ More than 6 months ago

☐ Never/I don't remember

**22. From the list of substances or technologies associated to food, chose the best option that reflects your worry level regarding their impact to health**

| Substance or technology                                            | Don't know | Slightly/not worried at all | Moderately worried | Very worry |
|--------------------------------------------------------------------|------------|-----------------------------|--------------------|------------|
| Sugar                                                              |            |                             |                    |            |
| Salt                                                               |            |                             |                    |            |
| <i>Agrótoxico*</i>                                                 |            |                             |                    |            |
| Pesticide                                                          |            |                             |                    |            |
| Plant protection product                                           |            |                             |                    |            |
| Food additive (eg. sweetener, dyes, preserving)                    |            |                             |                    |            |
| Heavy metal (eg. mercury, lead, arsenic)                           |            |                             |                    |            |
| Mycotoxins (eg. aflatoxins)                                        |            |                             |                    |            |
| Hormones and antibiotics (in meat)                                 |            |                             |                    |            |
| Substances present in food packaging (eg. bisphenol A, phthalates) |            |                             |                    |            |
| Transgenic/genetically modified food                               |            |                             |                    |            |
| Animal cloning                                                     |            |                             |                    |            |
| Nanotechnology                                                     |            |                             |                    |            |

\* legal term for pesticides in Brazil

**23. From the list of source of information about the risks from the presence of chemicals in food, chose the best option that reflect your trust level**

| Source of information                    | Don't know/don't have an opinion | Low/don't trust | Trust reasonably | Trust a lot |
|------------------------------------------|----------------------------------|-----------------|------------------|-------------|
| Media (TV, radio, journal)               |                                  |                 |                  |             |
| websites/blogs                           |                                  |                 |                  |             |
| Social media (eg. Facebook, Twitter)     |                                  |                 |                  |             |
| Scientists/universities                  |                                  |                 |                  |             |
| government authorities                   |                                  |                 |                  |             |
| Non-governmental organizations           |                                  |                 |                  |             |
| Food industry                            |                                  |                 |                  |             |
| Supermarket                              |                                  |                 |                  |             |
| Medical doctor (MD)/health professionals |                                  |                 |                  |             |
| Farmers                                  |                                  |                 |                  |             |
| Family and friends                       |                                  |                 |                  |             |
